# 1 The impact of ongoing COVID-19 lockdown on family finances 2 and mental health

3  
4 \*Anna M. H. Price<sup>1,2,3</sup>, Diana Contreras-Suárez<sup>4</sup>, Anna Zhu<sup>5</sup>, Natalie Schreurs<sup>1,2</sup>, Mary-Anne Measey<sup>1</sup>, Sue  
5 Woolfenden<sup>6,7,8</sup>, Jade Burley<sup>6,7,8</sup>, Hannah Bryson<sup>1,2</sup>, Daryl Efron<sup>2,3,9</sup>, Anthea Rhodes<sup>2,3,9,¶</sup>, Sharon Goldfeld<sup>1,2,3,¶</sup>

## 6 Affiliations<sup>^</sup>:

- 7 1. Centre for Community Child Health, The Royal Children's Hospital, Parkville, Vic
- 8 2. Population Health, Murdoch Children's Research Institute, Parkville, Vic
- 9 3. Department of Paediatrics, The University of Melbourne, Parkville, Vic
- 10 4. Melbourne Institute: Applied Economic & Social Research, University of Melbourne, Vic
- 11 5. School of Economics, Marketing and Finance, RMIT University, Melbourne, Vic
- 12 6. Sydney Children's Hospital Network, Sydney, NSW
- 13 7. Population Child Health Research Group, School of Women and Children's Health, University of NSW,  
14 Randwick, NSW
- 15 8. BestSTART-SW, Ingham Institute of Applied Medical Research, Liverpool, NSW
- 16 9. Department of General Medicine, The Royal Children's Hospital, Parkville, Vic
- 17

18 <sup>^</sup>All Australia

19 \*Corresponding author

20 <sup>¶</sup> AR and SG are joint senior authors.

## 21 Abstract

22 **Objectives:** Australia’s public health restrictions (‘lockdown’) in 2020 successfully contained the spread of  
23 COVID-19. These included a national ‘initial’ lockdown (March-May), and ‘ongoing’ lockdown (July-  
24 November) for metropolitan Victorian residents only. Australia’s experience offers an opportunity to assess  
25 impacts of lockdown on families with children, in the relative absence of disease morbidity and mortality. This  
26 study (1) described the experience of initial lockdown and (2) evaluated the impact of ongoing lockdown, on  
27 family finances and mental health.

28 **Methods:** Data were drawn from the June and September 2020 Royal Children’s Hospital National Child Health  
29 Polls. Caregivers of children from the states of Victoria and New South Wales reported on job/income loss;  
30 material deprivation (inability to pay for essential items); income-poverty; mental health (Kessler-6); impact on  
31 caregiver/child mental health; and caregiver/child coping. Data from N=1207/902 caregivers in June/September  
32 were analyzed; Aim (1) with weighted descriptives; Aim (2) with Difference-in-Difference adjusted linear  
33 regression models (New South Wales provided the comparator).

34 **Results:** Following initial lockdown, one-quarter of families reported job/income loss; one-third reported material  
35 deprivation. Negative impacts on mental health were reported for half the caregivers and one-third of children.  
36 Few caregivers or children had difficulties coping. During Victoria’s ongoing lockdown, job/income loss  
37 increased by 11% (95%CI: 3-18%); Kessler-6 poor mental health by 6% (95%CI: 0.3-12%) and negative mental  
38 health impacts by 12% for caregivers (95%CI: 6-23%) and 14% for children (95%CI: 4-20%). Female (versus  
39 male) caregivers, metropolitan (versus regional/rural) families, and families with elementary school-aged children  
40 (versus pre-/high-school) were most affected.

41 **Conclusions:** Ongoing lockdown had negative impacts on mental health, employment, and income, but not  
42 deprivation or poverty, likely because of the government income supplements introduced early in the pandemic.  
43 Balancing the benefits and harms of lockdown requires planned responses to outbreaks, and evidence-informed  
44 financial and mental health supports.

45

## 46 **Introduction**

47 The coronavirus SARS-COV-2 (COVID-19) was first identified in Australia in late January 2020. From March  
48 2020 onwards, Australian governments at the federal and state levels implemented a range of public health  
49 restrictions. These included stay-at-home orders, which are also known as 'lockdown'. At the time, Australia's  
50 response was among the most stringent internationally.(1) By 31 December 2020, the measures successfully  
51 contained infection to an overall incidence rate of 111 cases and 3.5 deaths per 100,000 people.(2) In contrast,  
52 other high-income countries with more lenient public health restrictions, such as the United States (US) and  
53 United Kingdom (UK), recorded rates of 5895 and 3730 cases per 100,000 people, respectively.(2) Reviews of  
54 previous pandemics and the data emerging from COVID-19 show how quarantine and isolation can harm  
55 household finances and individuals' mental health.(3-9) This is particularly the case for families with children,  
56 where there are mixed views on the balance of harms versus benefits of lockdown.(6, 10-12) Unlike many high-  
57 income countries, Australia's low incidence of COVID-19 makes it possible to examine the effects of lockdown  
58 mostly independent of the compounding disease impacts. We aimed to contribute to this evidence base using  
59 nationally-representative survey data collected from Australian families in June and September 2020.

60 The evolution of Australia's COVID-19 public health restrictions is presented in S1 Fig. From 23 March to 1 June  
61 2020, the national 'initial' lockdown included mandatory quarantine for returned travelers; travel bans; self-  
62 isolation for suspected/confirmed cases; stay-at-home orders; and closure of schools and 'non-essential'  
63 businesses.(13, 14) Five weeks after initial lockdown eased, a second wave of infections in the state of Victoria  
64 rapidly surpassed active cases in the first wave, with the national peak reaching 721 new cases (2.8 per 100,000)  
65 in 24 hours. From 8 July-23 November 2020, Victorian residents entered an 'ongoing' and more severe lockdown.  
66 The public health measures were strictest for metropolitan areas (in the state's capital city of Melbourne)  
67 compared with regional and rural Victoria. Previous lockdown measures were reinstated, the stay-at-home orders  
68 were further restricted, a night-time curfew was added, and early childhood education and care providers closed

69 (see S1 Fig.). Compliance with Australia's lockdown measures was driven by state enforcement, through police  
70 surveillance and fines.

71 To protect against the economic fallout of lockdown, the Australian federal government rapidly implemented a  
72 suite of short-term financial supports.(15, 16) Shown in S1 Fig., they included an unemployment supplement  
73 ('JobSeeker') which doubled recipients' social welfare benefits from \$550 to \$1,100 a fortnight;(15) a wage  
74 supplement for eligible businesses to retain their workforce ('JobKeeper');(16) allowing early access to  
75 superannuation;(17) and free childcare for working families.(18) Banks and creditors also allowed loan  
76 repayments to be deferred for up to 10 months. These social policy changes represent some of the largest (albeit  
77 temporary) in Australia's history. Indeed the JobKeeper and JobSeeker supplements were so significant that, by  
78 September 2020, levels of poverty and housing stress in Australia were substantially lower than the levels directly  
79 preceding COVID-19.(15)

80 While these social policies buffered Australians from poverty, global data emerging on COVID-19 show that  
81 lockdown has substantial and negative impacts on household finances and mental health. A cohort of over 70,000  
82 UK adults surveyed from March to August 2020 found that anxiety and depression symptoms were highest in the  
83 first weeks of lockdown, and worse for women and young adults.(19) An Australian cross-sectional survey of  
84 1200 adults repeated weekly from March 2020 found similar patterns for self-reported financial stress and  
85 material deprivation (unable to afford essential items).(20) The same survey data showed that mental distress  
86 tripled for parents from 8% pre-COVID-19 to 24% during the pandemic.(20) While children have been less  
87 affected by COVID-19 morbidity and mortality,(21, 22) they are more developmentally vulnerable to their  
88 socioeconomic environment than adults.(23, 24) Previous studies show that the stress and isolation of lockdown  
89 can negatively impact children's mental health for many months,(25) and school closures can compromise  
90 children's educational opportunities for years.(6, 10)

91 To our knowledge, no studies have investigated the impact of COVID-19 lockdown on both the financial and  
92 mental health experiences of families with children, in the relative absence of disease morbidity and mortality.

93 This evidence can inform economic and population health responses to the current pandemic as well as future  
94 crises. This study uses the natural experiment that occurred in Australia, whereby the state of Victoria experienced  
95 ongoing and more severe lockdown, to address this evidence gap. Data are drawn from the Royal Children’s  
96 Hospital (RCH) National Child Health Poll, the only nationally representative survey to measure COVID-19  
97 impacts for caregivers with children aged 0-17 years. The Poll was conducted in June (when the initial lockdown  
98 had ended for all Australians) and in September 2020 (when only metropolitan Victorians were in ongoing,  
99 stricter lockdown). Data from the neighboring state of New South Wales (NSW), which experienced only the  
100 initial lockdown, provide the comparator. The two states are inherently similar in terms of their population, size,  
101 and geographic location.

102 The specific study aims were to (1) describe families’ financial and mental health experiences directly after the  
103 initial lockdown and (2) evaluate the impact of ongoing lockdown on family finances and mental health (a)  
104 overall and (b) by caregiver gender (female versus male), child age (0-4, 5-12 and 13-17 years), and metropolitan  
105 (versus regional/rural) location. We hypothesized that the ongoing lockdown would be associated with increased  
106 financial hardship and worse mental health. We anticipated that these impacts would be worse for female  
107 caregivers and for metropolitan families.

108

## 109 **Methods**

110 **Design:** The RCH National Child Health Poll is conducted by the Royal Children’s Hospital in Melbourne,  
111 Australia. It collects periodic, cross-sectional surveys of nationally representative samples of approximately 2000  
112 Australian caregivers of children aged 0-17 years. Each survey explores a current or emerging public health issue  
113 of national relevance to child health. The process for selecting Poll topics is responsive to and informed by  
114 population health needs and the nation’s social agenda. Research themes and questions are chosen via review of  
115 the scientific and grey literature in consultation with multidisciplinary experts across the country. Surveys are

116 administered in English equivalent to a sixth-grade (elementary school) level. Surveys reported in this paper were  
117 conducted during 15-23 June and 15-29 September 2020 with two different samples and focused on families’  
118 experience of financial hardship and mental health 3 and 6 months into the COVID-19 pandemic. The Royal  
119 Children’s Hospital Human Research Ethics Committee approved the research (HREC 35254). After the Polls  
120 were conducted, we realized the opportunity to investigate the impact of ongoing lockdown relative to initial  
121 lockdown on families’ financial and mental health experiences.

122 **Sampling frame and data collection methods:** The surveys were conducted using web-based survey technology  
123 provided by the private vendor, Online Research Unit (ORU), under contract to the RCH. ORU has an established  
124 research panel of more than 200,000 Australian residents, with approximately 30% caring for a child in the target  
125 range (less than 18 years of age). Recruitment involves offline and online methods to select a nationally  
126 representative distribution by jurisdiction, caregiver gender and age. Panel members have a unique identifying  
127 number that means they can only access and complete the Poll once. Only one person per household can join the  
128 panel. To be eligible for the RCH Poll, panel members must have internet access to complete the online surveys.  
129 They must be living in Australia and aged 18 years or older. The field period for each Poll is approximately two  
130 weeks. Respondents are remunerated for their participation with points that can be exchanged for department store  
131 gift vouchers. All responses are anonymous.

132 **Measures:** Both Polls analyzed in this study captured demographic information including caregiver and child age  
133 and gender, number of children in care, caring for a child with additional health needs (chronic illness, health  
134 condition, disability), partner status, Healthcare Card status (identifies low-income), caregiver education level,  
135 Aboriginal or Torres Strait Islander status, country of birth, language spoken at home, living in  
136 metropolitan/regional/rural areas and postcode. Family finances were assessed using:

- 137 1. Nine items adapted from the CoRonavIruS Health Impact Survey (CRISIS) caregiver version (26): “What  
138 changes in employment or income have occurred in your household due to coronavirus/COVID-19?”  
139 (response options “yes” versus “no”) including: “job loss by one caregiver”; “job loss by two caregivers”,

140 “difficulty paying bills or for necessities”, “working longer hours”, “filing for unemployment”; “applying for  
141 Government assistance”; “reduced work hours”; “reduced total household income” or “none of the above”. A  
142 binary variable describing any job loss (by one or two caregivers) or reduction in income due to COVID-19  
143 (versus not) was created to enable comparison with other Australian studies, e.g. (27)

144 2. Eight items adapted from the Household, Income and Labour Dynamics in Australia (HILDA) Survey Wave  
145 18 Household Questionnaire Material Deprivation Module (28) asking “In the last month, because of money  
146 pressure did you miss or put off” (response options: “yes” versus “no”): mortgage or rent repayments;  
147 electricity, gas, water bills; food; healthcare; prescription medicines; home or car insurance; mobile phone  
148 bills; and internet. Two summary variables were created: (a) a binary “any material deprivation” variable  
149 identifying inability to pay for one or more essential items (versus “none”), and (b) a “total material  
150 deprivation count” summing the number of essential items where payment was missed or put off (possible  
151 range 0-8).

152 3. Current total household income before tax, categorized into 10 options ranging from “less than \$500 p/week”  
153 to “more than \$3,000 p/week”, plus “prefer not to say”. A binary variable was created to summarize low  
154 income (“less than AU\$1,000 p/week” versus more) based on Australian thresholds for HealthCare Card  
155 eligibility and definitions of income-poverty.(29)

156 Mental health was assessed using:

157 4. 6 items of the Kessler-6 (K6) assessing caregivers’ self-reported anxiety and depressive symptoms  
158 encountered in the last 4 weeks. Scored on a 5-point Likert scale from 1 “none of the time” to 5 “all of the  
159 time”. Summarized into (a) a continuous total score, and (b) a binary variable indicating “poor mental health”  
160 (total score 19 or more) versus not (total score 6-18).(30)

161 5. A 5-point item adapted from UK Young Minds Matter 31) describing the impact of COVID-19 on mental  
162 health, dichotomized into negative (“small negative/large negative”) versus positive (“none/small  
163 positive/large positive”). Reported by caregivers for (a) themselves and (b) each child.

164 6. A 4-point study-designed item reported by caregivers and dichotomized into “struggling or not coping” versus  
165 “coping or thriving”. Reported by caregivers for (a) themselves and (b) each child.

166 **Analysis methods:**

167 **Data preparation:** Families living in the Australian states of Victoria and NSW were retained in the analytic  
168 sample. For each family, we assigned data from the Australian Bureau of Statistics Socio-Economic Indexes for  
169 Areas (SEIFA) Index of Relative Disadvantage, a national area level index derived from census data for all  
170 individuals living in a postcode, with higher scores indicating greater advantage. To create a consistent analytic  
171 sample, the 41 families (comprising 63 children) who preferred not to report their country of birth, and the 1  
172 family (comprising 2 children) without SEIFA, were excluded (see S2 Fig.). To reduce the effects of non-  
173 response and non-coverage, all demographics, financial hardship, and mental health experiences were weighted  
174 using national demographic distributions for gender, state/territory, and SEIFA, as per the most recent Australian  
175 Bureau of Statistics data.

176 **Analysis:** Demographics, family finances and mental health (Aim 1) were described using proportions for  
177 categorical data and mean and standard deviation (SD) for continuous data. The change in family finances and  
178 mental health as related to lockdown (Aim 2a) was estimated using Difference-in-Difference analyses  
179 implemented as an interaction term between time (September versus June) and treatment group dummy variables  
180 (Victoria versus NSW) using linear regression models. The Difference-in-Difference approach is appropriate  
181 given our aim (to examine potential causal impacts) and because of the policy set-up. The ongoing lockdown was  
182 introduced only for Victoria and not for NSW. This created a natural experiment that allowed comparison of a  
183 group of families who were affected by ongoing lockdown (Victoria) with an unaffected group (NSW). The  
184 Difference-in-Difference estimator compares families’ outcomes before and after the policy implementation.  
185 The Difference-in-Difference models were run unadjusted and adjusted for all potential confounding variables  
186 available in the dataset: child and caregiver age and gender (male/female; noting no other genders were reported);  
187 number of children; child with additional health needs (versus not); one-caregiver family (versus not); owns a



188 Health Care Card (versus not); caregiver education (<Year 10/Year 10/Year 12/trade or apprenticeship/certificate  
189 or diploma/undergraduate/postgraduate); Aboriginal or Torres Strait Islander (versus not); caregiver born outside  
190 of Australia (versus in Australia); Home language other than English (versus speaks English at home); lives  
191 regionally or rurally (versus metropolitan); and SEIFA quintile. Caregiver mental health (total K6 score) and  
192 effects of family cluster were accounted for in all child models using robust estimation. These models were  
193 repeated for three subgroups (Aim 2b): (i) caregiver gender (female/male); (ii) child age (grouped at 0-4 years  
194 (preschool), 5-12 years (elementary school), 13-17 years (secondary/high school); (iii) and  
195 metropolitan/regional/rural location as a proxy for severity of lockdown, noting that metropolitan Victorians  
196 endured a more severe and longer lockdown than their regional and rural counterparts but also that the whole state  
197 was affected. Subgroup models were adjusted for the same variables except the grouping variable, which provided  
198 the strata for analysis.

199 We chose to run linear regression models as interpretation is simpler than logistic regression and most of the  
200 predicted y-values were bounded within 0-1. To check the robustness of these models, we ran marginal effects  
201 probit models for the dichotomous outcomes for the whole sample (not presented), which confirmed the linear  
202 regression output. For all models, the adjusted analyses are presented as the main results (unadjusted analyses are  
203 not included). As 293 caregivers preferred not to disclose their income, these analyses should be interpreted with  
204 caution. Data were analyzed with Stata v13.

205

## 206 **Results**

207 **Sample characteristics:** S2 Fig. presents the respondent flowchart for the analytic sample. In June, after the  
208 initial lockdown ended, 2697 Australian caregivers were invited and 2020 (75%) completed the Poll. Of these,  
209 1207 caregivers (604 Vic, 603 NSW) with 1992 children (985 Vic, 1008 NSW) were included in the analysis. In  
210 September, during Victoria's ongoing lockdown, 1769 caregivers were invited and 1434 (81%) completed the

211 Poll. Of these, 902 caregivers (460 Vic, 442 NSW) with 1584 children (786 Vic, 798 NSW) were included in the  
212 analysis.

213 Table 1 presents the weighted estimates for participant characteristics. Caregivers were an average of 40 years  
214 old, and three in five respondents were female. Each caregiver looked after an average of two children, and two in  
215 five cared for children with additional needs. One in five caregivers had a Health Care Card (an indicator of low  
216 income) and one-quarter were sole caregivers. One-quarter of respondents were born outside of Australia, and a  
217 similar proportion spoke a language other than English at home. One in six identified as living in regional or rural  
218 areas, compared with metropolitan capital cities. Ninety-five percent of respondents had completed high school  
219 (compared with around 85% nationally)(32) and less than 1% identified as Aboriginal or Torres Strait Islander  
220 (compared with 3% nationally).(33)

221 **Experiences after initial lockdown (Aim 1):** Table 2 and S1 Table describe families' financial and mental health  
222 experiences in June 2020, and Table 3 presents the adjusted mean differences (MDs) between NSW and Victoria  
223 ('Vic June' column). Twenty-nine percent of NSW caregivers reported job or income loss due to the COVID-19  
224 pandemic, compared with 24% of Victorians (MD=5%; 95% CI: 0.1 to 10%). Tables 2-3 show that financial and  
225 mental health experiences were otherwise similar between states in June. Fifteen percent of families reported low  
226 income, and 30% reported material deprivation (unable to pay for essential items including mortgage or rent;  
227 electricity, gas, water bills; food; healthcare; prescription medicines; home or car insurance; mobile phone bills;  
228 and internet). Caregivers averaged one missed payment out of the eight essential items. One in five caregivers  
229 reported poor mental health according to the K6; half said the pandemic negatively impacted their mental health;  
230 and one-third said their child's mental health was negatively impacted. Thirteen percent of caregivers and 10% of  
231 children were struggling or not coping.

232  
233

**Table 1. Demographic characteristics (weighted) of New South Wales and Victorian families surveyed after initial lockdown (June 2020) and during Victoria’s ongoing lockdown (September 2020) in proportions (95% confidence intervals) unless specified.**

| Demographic characteristics                                  | New South Wales    |                    | Victoria           |                    |
|--------------------------------------------------------------|--------------------|--------------------|--------------------|--------------------|
|                                                              | June               | September          | June               | September          |
| <b>Caregiver</b>                                             | <b>N=603</b>       | <b>N=442</b>       | <b>N=604</b>       | <b>N=460</b>       |
| Age (years), mean (CI)                                       | 40.7 (39.9 – 41.5) | 40.1 (39.3 – 40.9) | 40.1 (39.4 – 40.8) | 40.2 (39.5 – 41.0) |
| Female                                                       | 57.4 (51.5 – 63.0) | 61.5 (55.6 – 67.0) | 57.0 (51.3 – 62.5) | 57.8 (51.6 – 63.8) |
| Number of children in care, mean (CI)                        | 1.8 (1.7 – 1.9)    | 1.9 (1.8 – 1.9)    | 1.8 (1.7 – 1.9)    | 1.8 (1.8 – 1.9)    |
| Caregiver to child with additional health needs <sup>a</sup> | 41.8 (36.0 – 47.8) | 47.2 (41.2 – 53.3) | 34.7 (29.5 – 40.3) | 43.2 (37.0 – 49.6) |
| One-parent family                                            | 28.5 (23.0 – 34.7) | 20.2 (15.7 – 25.6) | 24.5 (19.5 – 30.1) | 14.4 (10.5 – 19.4) |
| Health Care Card (identifies low income)                     | 18.3 (13.8 – 24.0) | 20.9 (16.3 – 26.3) | 17.5 (13.4 – 22.5) | 17.7 (13.3 – 23.0) |
| <b>Education</b>                                             |                    |                    |                    |                    |
| Less than Year 10                                            | 0.9 (0.3 – 2.2)    | 1.2 (0.5 – 3.2)    | 0.5 (0.1 – 1.8)    | 1.2 (0.4 – 3.1)    |
| Year 10                                                      | 4.6 (2.7 – 7.9)    | 6.3 (3.9 – 9.9)    | 3.2 (1.4 – 7.1)    | 1.2 (0.5 – 2.6)    |
| Year 12                                                      | 8.9 (6.2 – 12.7)   | 11.1 (7.6 – 16.1)  | 12.9 (9.6 – 17.1)  | 11.5 (8.4 – 15.7)  |
| Trade / apprenticeship                                       | 4.8 (2.7 – 8.5)    | 4.8 (3.0 – 7.5)    | 2.4 (1.1 – 4.9)    | 2.9 (1.4 – 6.0)    |
| Certificate / diploma                                        | 21.1 (17.1 – 25.7) | 24.2 (19.3 – 29.8) | 23.4 (18.1 – 30.5) | 20.1 (15.5 – 25.6) |
| Undergraduate                                                | 39.0 (33.6 – 44.6) | 32.6 (27.2 – 38.6) | 37.8 (32.4 – 43.5) | 43.3 (37.2 – 49.7) |
| Postgraduate                                                 | 19.6 (15.9 – 24.0) | 19.8 (15.6 – 24.8) | 21.1 (16.3 – 26.8) | 19.8 (15.0 – 25.8) |
| Aboriginal or Torres Strait Islander                         | 0.2 (0.1 – 0.5)    | 0.3 (0.2 – 0.4)    | 0.2 (0.06 – 0.4)   | 0.3 (0.1 – 0.5)    |
| Born in Australia                                            | 77.2 (72.6 – 81.2) | 80.7 (75.8 – 84.7) | 72.1 (66.5 – 77.1) | 77.4 (71.9 – 82.1) |
| Home language other than English                             | 22.1 (18.0 – 26.7) | 31.1 (25.6 – 37.1) | 27.0 (22.0 – 32.8) | 20.2 (15.7 – 25.7) |
| Lives regionally or rurally (versus metropolitan)            | 18.8 (14.0 – 24.8) | 12.8 (9.2 – 17.6)  | 20.1 (15.8 – 25.2) | 14.2 (10.4 – 19.1) |
| <b>SEIFA Index of Social Disadvantage Quintile</b>           |                    |                    |                    |                    |
| 1 (most disadvantage)                                        | 19.4 (14.7 – 25.1) | 23.4 (18.1 – 29.8) | 15.2 (11.0 – 20.7) | 17.1 (12.5 – 23.0) |
| 2                                                            | 24.3 (18.7 – 30.8) | 19.7 (15.4 – 24.9) | 28.4 (22.8 – 34.7) | 23.6 (18.6 – 29.4) |
| 3                                                            | 18.7 (14.9 – 23.2) | 22.5 (17.7 – 28.3) | 20.5 (16.5 – 25.2) | 20.7 (15.3 – 27.3) |
| 4                                                            | 15.0 (11.8 – 18.9) | 11.5 (8.5 – 15.4)  | 18.7 (15.2 – 22.6) | 20.5 (16.3 – 25.5) |
| 5 (least disadvantage)                                       | 22.6 (18.9 – 26.8) | 22.8 (18.8 – 27.4) | 17.3 (14.3 – 20.7) | 18.1 (14.5 – 22.3) |
| <b>Child</b>                                                 | <b>N=1008</b>      | <b>N=798</b>       | <b>N=984</b>       | <b>N=786</b>       |
| Age (years), mean (CI)                                       | 9.6 (9.2 - 10.1)   | 8.6 (8.2 - 9.1)    | 8.9 (8.5 – 9.3)    | 8.8 (8.3 - 9.3)    |
| Female                                                       | 49.2 (44.9 – 53.6) | 49.6 (45.0 – 54.1) | 49.6 (45.2 – 54.0) | 49.0 (44.3 – 53.7) |

234 CI: 95% Confidence Interval. SEIFA: Socio-Economic Indexes for Areas. Data weighted using national demographic distributions for gender, state, and  
 235 SEIFA.

236 <sup>a</sup> Examples of additional health needs include asthma, epilepsy, and diabetes; of disability includes hearing impairment, intellectual disability, and autism

237

238 **Table 2. Financial and mental health experiences (weighted) of New South Wales and Victorian families surveyed after initial lockdown (June**  
 239 **2020) and during Victoria’s ongoing lockdown (September 2020) in proportions (95% confidence intervals) unless specified.**

| Financial and mental health experiences                                      | New South Wales    |                    | Victoria           |                    |
|------------------------------------------------------------------------------|--------------------|--------------------|--------------------|--------------------|
|                                                                              | June               | September          | June               | September          |
| 1. Job or income loss due to COVID-19 <sup>a</sup>                           | 28.5 (23.3 – 34.3) | 25.2 (20.5 – 30.6) | 23.6 (19.0 – 29.0) | 35.1 (29.0 – 41.7) |
| 2a. Any material deprivation: unable to pay for essential items <sup>b</sup> | 31.2 (26.0 – 37.0) | 30.4 (25.0 – 36.3) | 29.5 (24.5 – 35.0) | 25.9 (20.6 – 31.9) |
| 2b. Total material deprivation count <sup>b</sup> mean, (CI)                 | 1.10 (0.85 - 1.34) | 1.23 (0.92 - 1.53) | 1.12 (0.86 – 1.38) | 0.93 (0.70 – 1.17) |
| 3. Low household income (<AU\$1000 p/w) <sup>c</sup>                         | 14.7 (10.4 – 20.4) | 21.5 (15.2 – 26.0) | 15.2 (11.3 – 20.1) | 21.5 (16.0 – 28.3) |
| 4a. Caregiver mental health (K6 total score), mean (CI)                      | 12.9 (12.1 – 13.6) | 12.9 (12.2 – 13.8) | 12.9 (12.2 – 13.5) | 13.6 (12.8 – 14.4) |
| 4b. Caregiver poor mental health (K6 cut-point) <sup>d</sup>                 | 20.6 (15.6 – 26.8) | 16.6 (12.3 – 22.1) | 17.3 (13.0 – 22.5) | 22.2 (17.1 – 28.4) |
| 5a. Negative impact of COVID-19 on caregiver mental health                   | 50.2 (44.3 – 56.1) | 49.8 (43.9 – 55.9) | 48.3 (42.6 – 54.1) | 58.6 (52.3 – 64.6) |
| 5b. Negative impact of COVID-19 on child mental health                       | 32.1 (27.0 – 37.8) | 39.2 (33.3 – 45.4) | 30.8 (26.0 – 36.1) | 47.6 (41.3 – 54.0) |
| 6a. Caregiver struggling or not coping <sup>e</sup>                          | 11.4 (8.3 – 15.4)  | 16.3 (12.1 – 21.5) | 13.7 (9.9 – 18.6)  | 19.2 (14.6 – 24.7) |
| 6b. Child struggling or not coping <sup>e</sup>                              | 10.2 (7.2 – 14.2)  | 14.5 (10.4 – 19.7) | 8.7 (5.7 – 13.3)   | 14.2 (10.4 – 19.0) |

240 K6: Kessler-6, SEIFA: Socio-Economic Indexes for Areas Index of Relative Disadvantage. Data weighted using national demographic distributions for  
 241 gender, state, and SEIFA.

242 <sup>a</sup> Job loss by one or two adults, or reduction in income, due to COVID-19.

243 <sup>b</sup> Any one or more of mortgage or rent; electricity, gas, water bills; food; healthcare; prescription medicines; home or car insurance; mobile phone bills;  
 244 internet.

245 <sup>c</sup> Missing 293 caregivers who preferred not to report income.

246 <sup>d</sup> K6 dichotomized into a binary “poor mental health” (total score 19 or more) versus not (total score 6-18).

247 <sup>e</sup> Versus “coping/thriving” categories.

248 **The impact of ongoing lockdown (Aim 2):** Fig. 1 and Table 3 present the fully-adjusted Difference-in-  
249 Difference linear regression analyses testing the impact of ongoing lockdown on families' finances and mental  
250 health. Over the June-September 2020 period, relative to their NSW counterparts, Victorians reported an 11%  
251 increase in job or income loss (95% CI: 3 to 18%). There was no evidence that ongoing lockdown was related to a  
252 change in material deprivation or the proportion of households reporting low income. Ongoing lockdown was  
253 associated with a 0.83 point increase (95% CI: -0.08 to 1.74) in the K6 total score and a 6% increase (95% CI: 0.3  
254 to 12%) in the binary K6 measure of poor mental health. The negative impact of the COVID-19 pandemic on  
255 mental health was also exacerbated by ongoing lockdown, affecting 14% (95% CI: 6 to 23%) more Victorian  
256 caregivers and 12% (95% CI: 4 to 20%) more children relative to their NSW counterparts.

257 **Fig. 1. Adjusted mean Difference-in-Difference estimates (%) of the impact of ongoing lockdown on**  
258 **families' finances and mental health (all binary), overall and by subgroups, data drawn from Table 3**

259 Fig. 1 and Table 3 present the adjusted Difference-in-Difference analyses for the subgroups of caregiver gender  
260 (female/male); child age (0-4 (pre-school), 5-12 (elementary school), 13-17 years (secondary/high-school)); and  
261 location (metropolitan/regional-rural). The evidence for a negative impact of ongoing lockdown on job/income  
262 loss and caregiver mental health was strongest for female caregivers, caregivers of elementary-school aged  
263 children, and caregivers living in metropolitan areas. Notably, Table 3 ('NSW September' column) shows that the  
264 differences between initial and ongoing lockdowns in measures of job/income loss and K6 mental health were in  
265 part due to worsening outcomes for Victorians as well as improving outcomes for NSW families. The proportion  
266 of NSW caregivers reporting job/income loss decreased by 6% (95% CI: 0.2-11%) from June to September. The  
267 same reduction was evident in the poor mental health (K6) of female caregivers (mean difference=6%, 95% CI:  
268 0.3 to 12%). There was evidence that ongoing lockdown exacerbated the negative impact of the pandemic on  
269 children's mental health, for all subgroups except for families living in regional/rural areas. There was no  
270 evidence of a relationship between ongoing lockdown and whether the caregiver or their children were coping or  
271 not, for the cohort overall or by subgroups.

272  
273

**Table 3. Adjusted Difference-in-Difference linear regression models estimating the impact of ongoing lockdown on families' finances and mental health for the Total sample and by subgroups, using New South Wales (NSW) families in June 2020 as reference group.**

| Financial and mental health experiences                      | Subgroup                                                                     | Group category | N    | Mean Difference (95% confidence interval) |                        |                        |
|--------------------------------------------------------------|------------------------------------------------------------------------------|----------------|------|-------------------------------------------|------------------------|------------------------|
|                                                              |                                                                              |                |      | Vic ongoing lockdown effect               | Vic June               | NSW September          |
| 1. Job or income loss due to COVID-19 <sup>a</sup>           | Total sample                                                                 | All            | 2109 | 0.11 (0.03; 0.18)*                        | -0.05 (-0.10; -0.001)* | -0.06 (-0.11; -0.002)* |
|                                                              | 1. Caregiver gender                                                          | female         | 1084 | 0.12 (0.01; 0.23)*                        | -0.06 (-0.13; 0.01)^   | -0.06 (-0.14; 0.02)    |
|                                                              |                                                                              | male           | 1025 | 0.09 (-0.03; 0.20)                        | -0.03 (-0.11; 0.04)    | -0.06 (-0.14; 0.02)    |
|                                                              | 2. Child age (years)                                                         | 0-4            | 334  | 0.11 (0.09; 0.32)                         | -0.11 (-0.5; -0.03)    | -0.12 (-0.28; 0.04)    |
|                                                              |                                                                              | 5-12           | 922  | 0.11 (0.0001; 0.23)*                      | -0.07 (-0.14; -0.01)^  | -0.03 (-0.11; 0.05)    |
|                                                              |                                                                              |                | 853  | 0.11 (-0.02; 0.23)^                       | 0.01 (-0.09; 0.07)     | -0.07 (-0.16; 0.02)    |
|                                                              | 3. Location                                                                  | metro          | 1836 | 0.12 (0.04; 0.21)*                        | -0.06 (-0.12; -0.005)* | -0.07 (-0.13; -0.01)*  |
|                                                              |                                                                              | regional       | 273  | 0.06 (-0.14; 0.27)                        | -0.02 (-0.14; 0.10)    | 0.03 (-0.12; 0.18)     |
|                                                              | 2a. Any material deprivation: unable to pay for essential items <sup>b</sup> | Total sample   | All  | 2109                                      | 0.008 (-0.06; 0.08)    | -0.04 (-0.08; 0.01)    |
| 1. Caregiver gender                                          |                                                                              | female         | 1084 | 0.04 (-0.07; 0.15)                        | -0.05 (-0.12; 0.02)    | -0.06 (-0.13; 0.02)    |
|                                                              |                                                                              | male           | 1025 | -0.02 (-0.12; 0.07)                       | -0.03 (-0.09; 0.04)    | -0.02 (-0.09; 0.05)    |
| 2. Child age (years)                                         |                                                                              | 0-4            | 334  | -0.01 (-0.19; 0.18)                       | -0.08 (-0.21; 0.05)    | -0.05 (-0.19; -0.20)   |
|                                                              |                                                                              | 5-12           | 922  | -0.02 (-0.14; 0.08)                       | -0.02 (-0.09; 0.05)    | 0.005 (-0.1; 0.08)     |
|                                                              |                                                                              |                | 853  | 0.06 (-0.05; 0.17)                        | -0.05 (-0.12; 0.01)    | -0.08 (-0.16; 0.005)^  |
| 3. Location                                                  |                                                                              | metro          | 1836 | 0.01 (-0.07; 0.08)                        | -0.04 (-0.09; 0.01)    | -0.04 (-0.10; 0.01)    |
|                                                              |                                                                              | regional       | 273  | 0.03 (-0.20; 0.25)                        | 0.005 (-0.15; 0.15)    | 0.01 (-0.15; 0.18)     |
| 2b. Total material deprivation count, <sup>b</sup> mean (CI) |                                                                              | Total sample   | All  | 2109                                      | -0.06 (-0.40; 0.27)    | -0.06 (-0.27; 0.16)    |
|                                                              | 1. Caregiver gender                                                          | female         | 1084 | 0.07 (-0.40; 0.53)                        | -0.07 (-0.39; 0.25)    | -0.09 (-0.44; 0.26)    |
|                                                              |                                                                              | male           | 1025 | -0.15 (-0.39; 0.21)                       | -0.09 (-0.39; 0.21)    | -0.004 (-0.36; 0.35)   |
|                                                              | 2. Child age (years)                                                         | 0-4            | 334  | -0.42 (-1.42; 0.56)                       | 0.22 (-0.43; 0.87)     | 0.28 (-0.45; 1.01)     |
|                                                              |                                                                              | 5-12           | 922  | -0.14 (-0.68; 0.38)                       | -0.19 (-0.56; 0.17)    | 0.05 (-0.35; 0.44)     |
|                                                              |                                                                              |                | 853  | 0.21 (-0.25; 0.68)                        | -0.08 (-0.38; 0.22)    | -0.23 (-0.57; 0.11)    |
|                                                              | 3. Location                                                                  | metro          | 1836 | -0.06 (-0.43; 0.31)                       | -0.07 (-0.30; 0.17)    | -0.01 (-0.28; 0.26)    |
|                                                              |                                                                              | regional       | 273  | 0.07 (-0.88; 1.02)                        | 0.02 (-0.59; 0.64)     | -0.11 (-0.86; 0.64)    |
|                                                              | 3. Low household income (<AU\$1000 p/w) <sup>c</sup>                         | Total sample   | All  | 1816                                      | 0.02 (-0.04; 0.08)     | 0.01 (-0.02; 0.05)     |
| 1. Caregiver gender                                          |                                                                              | female         | 922  | 0.005 (-0.09; 0.10)                       | 0.01 (-0.05; 0.07)     | 0.04 (-0.03; 0.10)     |
|                                                              |                                                                              | male           | 894  | 0.02 (-0.06; 0.09)                        | 0.02 (-0.02; 0.06)     | 0.03 (-0.02; 0.08)     |
| 2. Child age (years)                                         |                                                                              | 0-4            | 287  | -0.02 (-0.19; 0.14)                       | 0.04 (-0.07; 0.15)     | 0.08 (-0.03; 0.20)     |
|                                                              |                                                                              | 5-12           | 810  | 0.02 (-0.07; 0.11)                        | -0.001 (-0.06; 0.05)   | -0.01 (-0.05; 0.06)    |

| Financial and mental health experiences                    | Subgroup                                                     | Group category | N    | Mean Difference (95% confidence interval) |                      |                        |
|------------------------------------------------------------|--------------------------------------------------------------|----------------|------|-------------------------------------------|----------------------|------------------------|
|                                                            |                                                              |                |      | Vic ongoing lockdown effect               | Vic June             | NSW September          |
|                                                            | 3. Location                                                  | 13-17          | 719  | 0.02 (-0.08; 0.12)                        | 0.02 (-0.03; 0.07)   | 0.01 (-0.06; 0.08)     |
|                                                            |                                                              | metro          | 1577 | 0.02 (-0.04; 0.08)                        | 0.01 (-0.03; 0.05)   | 0.02 (-0.02; 0.06)     |
|                                                            |                                                              | regional       | 239  | -0.07 (-0.25; 0.12)                       | 0.05 (-0.07; 0.18)   | 0.08 (-0.05; 0.22)     |
| 4a. Caregiver mental health (K6 total score), mean (CI)    | Total sample                                                 | All            | 2109 | 0.83 (-0.08; 1.74)^                       | 0.02 (-0.55; 0.58)   | -0.13 (-0.78; 0.52)    |
|                                                            | 1. Caregiver gender                                          | female         | 1084 | 1.85 (0.56; 3.13)*                        | -0.23 (-1.06; 0.61)  | -0.76 (-1.65; 0.14)^   |
|                                                            |                                                              | male           | 1025 | -0.14 (-1.45; 1.16)                       | 0.24 (-0.54; 1.01)   | 0.44 (-0.51; 1.39)     |
|                                                            | 2. Child age (years)                                         | 0-4            | 334  | 0.47 (-1.98; 2.93)                        | -0.75 (-2.35; 0.85)  | -0.47 (-2.39; 1.45)    |
|                                                            |                                                              | 5-12           | 922  | 1.52 (0.20; 2.85)*                        | -0.22 (-1.10; 0.65)  | -0.21 (-1.12; 0.70)    |
|                                                            |                                                              | 13-17          | 853  | 0.37 (-1.14; 1.87)                        | 0.56 (-0.30; 1.42)   | 0.10 (-0.97; 1.17)     |
|                                                            | 3. Location                                                  | metro          | 1836 | 0.68 (-0.31; 1.66)                        | 0.03 (-0.59; 0.64)   | 0.03 (-0.68; 0.74)     |
|                                                            |                                                              | regional       | 273  | 2.01 (-0.55; 4.57)                        | -0.02 (-1.55; 1.52)  | -1.29 (-2.87; 0.30)    |
|                                                            | 4b. Caregiver poor mental health (K6 cut-point) <sup>d</sup> | Total sample   | All  | 2109                                      | 0.06 (-0.003; 0.12)^ | -0.01 (-0.05; 0.03)    |
| 1. Caregiver gender                                        |                                                              | female         | 1084 | 0.10 (0.02; 0.19)*                        | -0.02 (-0.07; 0.04)  | -0.06 (-0.12; -0.003)* |
|                                                            |                                                              | male           | 1025 | 0.02 (-0.07; 0.10)                        | -0.01 (-0.05; 0.04)  | 0.02 (-0.05; 0.08)     |
| 2. Child age (years)                                       |                                                              | 0-4            | 334  | 0.06 (-0.11; 0.22)                        | -0.09 (-0.20; -0.02) | -0.06 (-0.19; 0.07)    |
|                                                            |                                                              | 5-12           | 922  | 0.13 (0.03; 0.23)*                        | -0.04 (-0.10; 0.02)  | -0.04 (-0.11; 0.02)    |
|                                                            |                                                              | 13-17          | 853  | -0.01 (-0.10; 0.07)                       | 0.05 (-0.002; 0.10)* | 0.02 (-0.04; 0.08)     |
| 3. Location                                                |                                                              | metro          | 1836 | 0.05 (-0.02; 0.11)                        | -0.01 (-0.05; 0.03)  | -0.01 (-0.06; 0.04)    |
|                                                            |                                                              | regional       | 273  | 0.15 (-0.01; 0.30)^                       | -0.01 (0.11; 0.08)   | -0.10 (-0.20; -0.002)* |
| 5a. Negative impact of COVID-19 on caregiver mental health |                                                              | Total sample   | All  | 2109                                      | 0.14 (0.06; 0.23)*   | -0.05 (-0.11; 0.01)^   |
|                                                            | 1. Caregiver gender                                          | female         | 1084 | 0.18 (0.07; 0.30)*                        | -0.06 (-0.14; 0.02)  | -0.03 (-0.12; 0.05)    |
|                                                            |                                                              | male           | 1025 | 0.09 (-0.04; 0.21)                        | -0.03 (-0.11; 0.05)  | -0.04 (-0.13; 0.05)    |
|                                                            | 2. Child age (years)                                         | 0-4            | 334  | 0.11 (-0.10; 0.33)                        | 0.001 (-0.15; 0.15)  | -0.10 (-0.26; 0.06)    |
|                                                            |                                                              | 5-12           | 922  | 0.21 (0.08; 0.34)*                        | -0.04 (-0.13; 0.04)  | -0.09 (-0.18; 0.003)^  |
|                                                            |                                                              | 13-17          | 853  | 0.05 (-0.09; 0.005)                       | -0.06 (-0.15; 0.03)  | 0.06 (-0.05; 0.16)     |
|                                                            | 3. Location                                                  | metro          | 1836 | 0.14 (0.05; 0.23)*                        | -0.04 (-0.10; 0.02)  | -0.02 (0.09; 0.04)     |
|                                                            |                                                              | regional       | 273  | 0.09 (-0.16; 0.34)                        | -0.07 (-0.23; 0.09)  | -0.13 (-0.31; 0.05)    |
|                                                            | 5b. Negative impact of COVID-19 on child mental health       | Total sample   | All  | 3576                                      | 0.12 (0.04; 0.20)*   | 0.02 (-0.03; 0.07)     |
| 1. Caregiver gender                                        |                                                              | female         | 1842 | 0.11 (-0.005; 0.22)^                      | 0.02 (-0.05; 0.09)   | 0.10 (0.02; 0.18)*     |
|                                                            |                                                              | male           | 1734 | 0.13 (0.01; 0.24)*                        | 0.04 (-0.03; 0.11)   | -0.01 (-0.09; 0.07)    |

| Financial and mental health experiences             | Subgroup                                        | Group category      | N                   | Mean Difference (95% confidence interval) |                      |                      |                     |
|-----------------------------------------------------|-------------------------------------------------|---------------------|---------------------|-------------------------------------------|----------------------|----------------------|---------------------|
|                                                     |                                                 |                     |                     | Vic ongoing lockdown effect               | Vic June             | NSW September        |                     |
| health                                              | 2. Child age (years)                            | 0-4                 | 710                 | 0.17 (0.05; 0.29)*                        | -0.02 (-0.10; 0.06)  | 0.01 (-0.08; 0.09)   |                     |
|                                                     |                                                 | 5-12                | 1757                | 0.10 (-0.01; 0.21)^                       | 0.05 (-0.03; 0.12)   | 0.06 (-0.02; 0.14)   |                     |
|                                                     |                                                 | 13-17               | 1109                | 0.17 (0.03; 0.30)*                        | 0.01 (0.07; 0.09)    | 0.01 (-0.09; 0.10)   |                     |
|                                                     | 3. Location                                     | metro               | 3099                | 0.13 (0.05; 0.22)*                        | 0.04 (-0.01; 0.09)   | 0.05 (-0.01; 0.11)   |                     |
|                                                     |                                                 | regional            | 477                 | 0.02 (-0.21; 0.24)                        | -0.09 (0.22; 0.05)   | 0.02 (-0.14; 0.18)   |                     |
|                                                     | Total sample                                    | All                 | 2109                | 0.03 (-0.03; 0.09)                        | -0.01 (-0.04; 0.03)  | 0.02 (-0.02; 0.07)   |                     |
| 6a. Caregiver struggling or not coping <sup>e</sup> | 1. Caregiver gender                             | female              | 1084                | 0.03 (-0.05; 0.12)                        | 0.02 (-0.04; 0.07)   | 0.02 (-0.04; 0.08)   |                     |
|                                                     |                                                 | male                | 1025                | 0.02 (-0.07; 0.11)                        | -0.03 (-0.08; 0.02)  | 0.04 (-0.02; 0.11)   |                     |
|                                                     | 2. Child age (years)                            | 0-4                 | 334                 | 0.03 (-0.13; 0.18)                        | -0.11 (-0.23; 0.002) | -0.07 (-0.20; 0.06)  |                     |
|                                                     |                                                 | 5-12                | 922                 | 0.05 (-0.04; 0.15)                        | -0.01 (-0.06; 0.05)  | 0.05 (-0.01; 0.12)   |                     |
|                                                     |                                                 | 13-17               | 853                 | 0.02 (-0.07; 0.12)                        | 0.03 (-0.02; 0.09)   | 0.03 (-0.04; 0.09)   |                     |
|                                                     | 3. Location                                     | metro               | 1836                | 0.05 (-0.02; 0.11)                        | -0.01 (-0.05; 0.03)  | 0.02 (-0.03; 0.07)   |                     |
|                                                     |                                                 | regional            | 273                 | -0.07 (-0.24; 0.11)                       | 0.04 (-0.05; 0.14)   | 0.06 (-0.06; 0.18)   |                     |
|                                                     | Total sample                                    | All                 | 3576                | 0.02 (-0.03; 0.07)                        | 0.002 (-0.02; 0.03)  | 0.03 (-0.004; 0.07)^ |                     |
|                                                     | 6b. Child struggling or not coping <sup>e</sup> | 1. Caregiver gender | female              | 1842                                      | 0.04 (-0.03; 0.10)   | -0.02 (-0.05; 0.02)  | 0.03 (-0.02; 0.07)  |
|                                                     |                                                 |                     | male                | 1734                                      | -0.005 (-0.08; 0.07) | 0.02 (-0.02; 0.05)   | 0.05 (-0.009; 0.10) |
| 2. Child age (years)                                |                                                 | 0-4                 | 710                 | -0.00004 (-0.08; 0.08)                    | 0.04 (-0.09; 0.02)   | 0.005 (0.06; 0.07)   |                     |
|                                                     |                                                 | 5-12                | 1757                | 0.02 (-0.05; 0.10)                        | 0.001 (-0.04; 0.04)  | 0.04 (-0.01; 0.09)^  |                     |
|                                                     |                                                 | 13-17               | 1109                | 0.04 (-0.03; 0.12)                        | 0.01 (-0.03; 0.04)   | 0.02 (-0.04; 0.07)   |                     |
| 3. Location                                         |                                                 | metro               | 3099                | 0.04 (-0.02; 0.09)                        | -0.003 (-0.03; 0.02) | 0.03 (-0.01; 0.06)   |                     |
|                                                     | regional                                        | 477                 | -0.06 (-0.19; 0.07) | 0.03 (-0.04; 0.10)                        | 0.03 (-0.06; 0.13)   |                      |                     |

274 K6: Kessler-6, SEIFA: Socio-Economic Indexes for Areas Index of Relative Disadvantage.

275 Reference group is NSW in June. All differences are mean difference (MD); note, for binary outcomes this is a proportion between 0-1.

276 Estimated Difference-in-difference interaction adjusted for: child and caregiver age and gender (male/female; noting no other genders were reported),  
 277 number of children, child with additional health needs (versus not); one-caregiver family (versus not); owns a Health Care Card (versus not); caregiver  
 278 education (<Year 10/Year 10/Year 12/trade or apprenticeship/certificate or diploma/undergraduate/postgraduate); Aboriginal and Torres Strait Islander  
 279 (versus not); caregiver born outside of Australia (versus in Australia); Home language other than English (versus speaks English at home); lives regionally  
 280 or rurally (versus metropolitan); and SEIFA quintile. Caregiver mental health (total K6 score) and effects of family cluster were accounted for in all child  
 281 models using robust estimation.

282 \*p<0.05, ^p<0.1

283 <sup>a</sup> Job loss by one or two adults, or reduction in income, due to COVID-19.



284 <sup>b</sup> Any one or more of mortgage or rent; electricity, gas, water bills; food; healthcare; prescription medicines; home or car insurance; mobile phone bills;  
285 internet.  
286 <sup>c</sup> Missing 293 caregivers who preferred not to report income.  
287 <sup>d</sup> K6 dichotomized into a binary “poor mental health” (total score 19 or more) versus optimal (total score 6-18).  
288 <sup>e</sup> Versus “coping/thriving” categories.

## 289 Discussion

290 This study investigated the impacts of COVID-19 lockdown on family finances and mental health in the context  
291 of Australia's minimal disease burden. In June 2020, after an initial national lockdown from March-May, a  
292 quarter of Australian caregivers of children aged 0-17 years reported job or income loss due to the pandemic. One  
293 in three reported material deprivation (being unable to afford essential items such as housing, food, amenities, or  
294 healthcare). One in five caregivers reported poor mental health; half said that the first three months of the  
295 pandemic had negatively impacted their mental health; and a third reported the same negative impact for their  
296 children. By September 2020, Victoria's ongoing lockdown from July onwards was associated with increased job  
297 and income loss, and negative mental health impacts for caregivers and children, compared with neighboring  
298 NSW. There was no evidence that ongoing lockdown affected families' experiences of material deprivation or  
299 income poverty. As anticipated, the evidence for the negative impacts of lockdown were strongest for female  
300 caregivers and families living in metropolitan Victoria. While the negative impacts of ongoing lockdown affected  
301 families across children's ages, they were most pronounced for families with children of elementary school  
302 compared with preschool or high school ages.

303 Although the RCH Poll does not have pre-pandemic data for comparison, the financial and mental health impacts  
304 reported by the June cohort are consistent with national data. In April, the Australian Bureau of Statistics  
305 estimated that 2.7 million Australians (almost 20% of the working population) lost their jobs or hours of  
306 work.(34) The Australian Temperament Project survey of 498 families from March-September 2020,(27) and the  
307 right@home trial survey of 319 mothers from May-December 2020 (unpublished), reported job/income losses of  
308 24% and 27% respectively, using the same questions as our study. The third of families reporting material  
309 deprivation is equivalent to pre-pandemic data from the Longitudinal Study of Australian Children.(35) In our  
310 study, one in five families reported poor mental health in June 2020 according to the K6. This aligns with the  
311 Australian 'Pulse of the Nation' survey in which 24% of parents reported mental distress across the first months  
312 of lockdown. Despite the global differences between countries' infection rates and governments' approaches to

313 public health restrictions, there are commonalities in the mental health data emerging from the pandemic.(36-39)

314 The Born in Bradford study found that 19% and 16% of mothers reported clinically-significant levels of

315 depression and anxiety, respectively, during the first lockdown in UK (April-June 2020).(40) In a nationally

316 weighted survey from the US in June, 27% of parents said their mental health had declined during the

317 pandemic.(41)

318 Given the negative economic and psychosocial impacts of lockdown,(36-41) it follows that ongoing lockdown

319 was associated with increased job and income loss, and poor mental health. Our findings of a larger negative

320 impact on the mental health of female versus male caregivers is consistent with similar findings from the

321 aforementioned ‘Pulse’ data.(20) That families with elementary school-aged children were most affected is likely

322 due to the stress and disruption of home-schooling in July-September. More supervision is required for children in

323 elementary school than high school, and balancing home schooling with usual paid or unpaid work was a

324 substantial challenge for families.(42) Finally, metropolitan Victorians experienced stricter and ongoing lockdown

325 than their regional and rural counterparts. This explains the findings of increased job/income loss and greater

326 negative impacts on caregiver and child mental health for this subgroup, relative to their NSW counterparts.

327 Our findings for children are like other studies investigating the lockdown experiences of young people. Analysis

328 by the Australian Human Rights Commission in the earliest months of the pandemic found that increased

329 numbers of older children reported first time mental health challenges or concerns of self-harm.(43) The COVID-

330 19 Unmasked Study which surveyed Australian families with young children (aged 1-5 years) also found that

331 Victorian caregivers exposed to ongoing lockdown reported increasing mental health symptoms for themselves

332 and their children.(44) Interestingly, in the Unmasked study, young children living outside of Victoria (exposed to

333 only the initial lockdown) were still experiencing higher than average levels of anxiety symptoms by the time of

334 Victoria’s ongoing lockdown. We found a similar pattern in our study. For the NSW families exposed to initial

335 lockdown only, caregivers reported improved mental health for themselves by September but not for their

336 children.

337 This study has several strengths. It builds on existing COVID-19 research to show the specific impacts of ongoing  
338 lockdown on families in the relative absence of the virus, i.e., isolating the toll that widespread mortality has on  
339 mental health. The RCH Poll is the only nationally-representative survey of Australian families with children to  
340 assess financial and mental health impacts of COVID-19. It comprised large cross-sectional and nationally  
341 representative surveys, which employed strong methodology (surveys piloted and included the validated K6);  
342 collected data on caregiver and child mental health; surveyed female and male caregivers; and achieved good  
343 response rates. In other Polls, indicators (frequency/prevalence) across a range of topics are almost universally  
344 consistent with more traditionally-obtained estimates, providing support for the sample selection and survey  
345 administration methods. The Difference-in-Difference modeling is well-established method of analyzing policy  
346 change (in our case, lockdown law differences). The natural experiment allowed us to gauge causal relationships  
347 by simulating a counterfactual; that is, what would have happened in the absence of a second lockdown.

348 There were also limitations. The Poll only samples adults who are 18 years and older, so younger caregivers are  
349 missing. As a subgroup who experience more adversity, this means results may be conservative. Measures were  
350 caregiver-reported, by only one caregiver in the household. Ideally, information would be collected from all  
351 caregivers and children directly. A significant proportion of caregivers did not report family income, and the  
352 sample sizes for preschool-aged children and regional/rural subgroup analyses were small, limiting power for  
353 detecting differences. There were also limitations to the analyses. The common trends' assumption of Difference-  
354 in-Difference estimation supposes that the untreated units (NSW in September) provide the appropriate  
355 counterfactual of the trend that the treated units would have followed if they had not been treated. However, our  
356 results are defensible because the time between the first and second surveys was short (4 months); thus,  
357 minimizing potential differential trends across NSW and VIC. We also controlled for all available and potentially  
358 confounding socioeconomic and demographic variables in the analyses.

359 This work extends the existing evidence base by trying to understand the specific impacts of ongoing lockdown in  
360 the context of minimal disease burden. Based on our findings, we offer three considerations for pandemic  
361 response and recovery planning. First, while job and income loss increased with ongoing lockdown, this did not

362 translate to increased material deprivation or income poverty. This finding provides support for the effectiveness  
363 of the Australian government's extraordinary income supplements, introduced early in the pandemic to offset the  
364 anticipated economic fallout of lockdown. This interpretation is supported by modeling demonstrating the  
365 substantial reductions in Australia's poverty levels resulting from these social policies.(15) Given that the income  
366 supplements offered were temporary, the fundamental need for financial security must be considered when  
367 enacting future lockdown measures in response to further outbreaks.

368 Second, for families who were unexposed to ongoing lockdown, there was some recovery in employment/income  
369 and female caregivers' mental health. Population-level data for UK adults demonstrated a similar pattern of  
370 improved mental health after the initial sharp decline resulting from lockdown.(19) This suggests that many  
371 caregivers can recover from the negative impacts of lockdown, provided they have effective financial buffers (and  
372 presumably that the public health restrictions are also effective). While the Poll data were limited, they did not  
373 suggest a recovery for children. It is important that children's experiences and needs are prioritized during  
374 response and recovery planning so that any persistent negative impacts are adequately redressed.(45, 46)

375 Third, the negative financial and mental health impacts of ongoing lockdown were substantial, and  
376 disproportionately affected families with elementary school-aged children, and female caregivers. In a country  
377 such as Australia, which has encountered relatively little viral impact, the negative impacts of lockdown,  
378 especially for school-aged children and female caregivers, may outweigh the direct impact of the disease itself.  
379 While this study was underpowered to investigate the experience of families living in lower socioeconomic  
380 environments, the evidence suggests that inequity is likely to be exacerbated and entrenched by the social and  
381 economic disruption of COVID-19.(27, 46, 47) Ongoing follow-up of cohorts is necessary to understand if and  
382 how caregivers and children recover from lockdown, and how best to support the population groups who are most  
383 adversely affected. Balancing the benefits and harms of lockdown requires planned responses to future outbreaks,  
384 and evidence-informed financial and mental health supports.

## 385 References

- 386 1. Hale T, Angrist, Noam., Goldszmidt R, Kira B, Petherick A, Phillips T, et al. A global panel database of  
387 pandemic policies (Oxford COVID-19 Government Response Tracker). *Nature Human Behaviour*.  
388 <https://doi.org/10.1038/s41562-021-01079-8>. Retrieved from: [https://ourworldindata.org/grapher/covid-](https://ourworldindata.org/grapher/covid-stringency-index)  
389 [stringency-index](https://ourworldindata.org/grapher/covid-stringency-index) [Online Resource] (2021). 2021.
- 390 2. World Health Organization. WHO Coronavirus Disease (COVID-19) Dashboard [updated 6 Dec 2020].  
391 Available from: <https://covid19.who.int/>.
- 392 3. Brooks SK, Webster RK, Smith LE, Woodland L, Wessely S, Greenberg N, et al. The psychological  
393 impact of quarantine and how to reduce it: rapid review of the evidence. *The Lancet*. 2020;395( ):912-20.
- 394 4. Loades ME, Chatburn E, Higson-Sweeney N, Reynolds S, Shafran R, Brigden A, et al. Rapid Systematic  
395 Review: The Impact of Social Isolation and Loneliness on the Mental Health of Children and Adolescents in the  
396 Context of COVID-19. *J Am Acad Child Adolesc Psychiatry*. 2020;59(11):1218-39.
- 397 5. Nearchou F, Flinn C, Niland R, Subramaniam SS, Hennessy E. Exploring the Impact of COVID-19 on  
398 Mental Health Outcomes in Children and Adolescents: A Systematic Review. *International Journal of*  
399 *Environmental Research and Public Health*. 2020;17(22):8479.
- 400 6. Gibbs L, Nursey J, Cook J, Ireton G, Alkemade N, Roberts M, et al. Delayed disaster impacts on  
401 academic performance of primary school children. *Child development*. 2019;90(4):1402-12.
- 402 7. Russell F, Uahwatanasakul W, Neal E. Melbourne Children's Campus. COVID-19 kids research evidence  
403 update. 2020.
- 404 8. Racine N, Cooke JL, Eirich R, Korczak DJ, McArthur B, Madigan S. Child and adolescent mental illness  
405 during COVID-19: A rapid review. *Psychiatry research*. 2020.
- 406 9. Galea S, Merchant RM, Lurie N. The Mental Health Consequences of COVID-19 and Physical  
407 Distancing: The Need for Prevention and Early Intervention. *JAMA Internal Medicine*. 2020;180(6):817-8.
- 408 10. Dorn E, Hancock B, Sarakatsannis J, Viruleg E. COVID-19 and learning loss—disparities grow and  
409 students need help. McKinsey & Company, Public & Social Sector. [https://www.mckinsey.com/industries/public-](https://www.mckinsey.com/industries/public-and-social-sector/our-insights/covid-19-and-learning-loss-disparities-grow-and-students-need-help)  
410 [and-social-sector/our-insights/covid-19-and-learning-loss-disparities-grow-and-students-need-help](https://www.mckinsey.com/industries/public-and-social-sector/our-insights/covid-19-and-learning-loss-disparities-grow-and-students-need-help) [Accessed 26  
411 March 2021]. 2020 8 December 2020.
- 412 11. Evans S, Mikocka-Walus A, Klas A, Olive L, Sciberras E, Karantzas G, et al. From “It Has Stopped Our  
413 Lives” to “Spending More Time Together Has Strengthened Bonds”: The Varied Experiences of Australian  
414 Families During COVID-19. *Frontiers in Psychology*. 2020;11(2906).
- 415 12. Suleman S, Ratnani Y, Stockley K, Jetty R, Smart K, Bennett S, et al. Supporting children and youth  
416 during the COVID-19 pandemic and beyond: A rights-centred approach. *Paediatr Child Health*. 2020;25(6):333-6.
- 417 13. Department of Health and Human Services. Updates about the outbreak of the coronavirus disease  
418 (COVID-19): State Government of Victoria; 2020 [Available from:  
419 <https://www.dhhs.vic.gov.au/coronavirus/updates>.
- 420 14. Australian Government. Coronavirus (COVID-19) response site. News and Updates: Australian  
421 Government; 2020 [Available from: <https://www.australia.gov.au/news-and-updates>.
- 422 15. Phillips B, Gray M, Biddle N. COVID-19 JobKeeper and JobSeeker impacts on poverty and housing  
423 stress under current and alternative economic and policy scenarios. Acton, ACT: Australian National University  
424 Centre for Social Research and Methods; 2020.
- 425 16. Cassells R, Duncan A. JobKeepers and JobSeekers: How many workers will lose and how many will  
426 gain? Bentley, WA: Curtin University; 2020.
- 427 17. Gandy S. Care expands for moms, babies. *Nursing & Allied Healthweek*. 1996;1(13):1.
- 428 18. Klappdor M. Parliament of Australia. COVID-19 Economic response—free child care.  
429 [https://www.aph.gov.au/About Parliament/Parliamentary Departments/Parliamentary Library/FlagPost/2020/Ap-](https://www.aph.gov.au/About/Parliament/Parliamentary_Departments/Parliamentary_Library/FlagPost/2020/April/Coronavirus_response-Free_child_care)  
430 [ril/Coronavirus\\_response-Free\\_child\\_care](https://www.aph.gov.au/About/Parliament/Parliamentary_Departments/Parliamentary_Library/FlagPost/2020/April/Coronavirus_response-Free_child_care) [Accessed 26 March 2021]. 2020.
- 431 19. Fancourt D, Steptoe A, Bu F. Trajectories of anxiety and depressive symptoms during enforced isolation  
432 due to COVID-19 in England: a longitudinal observational study. *The Lancet Psychiatry*. 2021;8(2):141-9.

- 433 20. Broadway B, Payne AA, Salamanca N. Coping with COVID-19: Rethinking Australia. Melbourne  
434 Institute: Applied Economic & Social Research, the University of Melbourne. 2020.
- 435 21. Shen K-L, Yang Y-H, Jiang R-M, Wang T-Y, Zhao D-C, Jiang Y, et al. Updated diagnosis, treatment and  
436 prevention of COVID-19 in children: experts' consensus statement (condensed version of the second edition).  
437 World Journal of Pediatrics. 2020;16(3):232-9.
- 438 22. Bruining H, Bartels M, Polderman TJ, Popma A. COVID-19 and child and adolescent psychiatry: an  
439 unexpected blessing for part of our population? Eur Child Adolesc Psychiatry. 2020:1-2.
- 440 23. Duncan GJ, Ziol-Guest KM, Kalil A. Early-Childhood Poverty and Adult Attainment, Behavior, and  
441 Health. Child Development. 2010;81(1):306-25.
- 442 24. Goldfeld S, O'Connor M, Chong S, Gray S, O'Connor E, Woolfenden S, et al. The impact of  
443 multidimensional disadvantage over childhood on developmental outcomes in Australia. International Journal of  
444 Epidemiology. 2018;47(5):1485-96.
- 445 25. Loades ME, Chatburn E, Higson-Sweeney N, Reynolds S, Shafran R, Brigden A, et al. Rapid Systematic  
446 Review: The Impact of Social Isolation and Loneliness on the Mental Health of Children and Adolescents in the  
447 Context of COVID-19. Journal of the American Academy of Child & Adolescent Psychiatry. 2020;59(11):1218-  
448 39.e3.
- 449 26. Nikolaidis A, Paksarian D, Alexander L, DeRosa J, Dunn J, Nielson DM, et al. The Coronavirus Health  
450 and Impact Survey (CRISIS) reveals reproducible correlates of pandemic-related mood states across the Atlantic.  
451 medRxiv. 2020.
- 452 27. O'Connor M, Greenwood C, Letcher P, Giallo R, Priest N, Goldfeld S, et al. Inequalities in the  
453 distribution of COVID-19 related financial difficulties for families with young children. Child: Care, Health and  
454 Development. 2021.
- 455 28. Wilkins R, Lass I. The Household, Income and Labour Dynamics in Australia Survey: Selected Findings  
456 from Waves 1 to 16. Melbourne Institute: Applied Economic & Social Research, University of Melbourne. 2018.
- 457 29. Davidson P, Saunders P, Bradbury B, Wong M. Poverty in Australia 2020: Part 1, Overview.  
458 ACOSS/UNSW Poverty and Inequality Partnership Report No. 3, Sydney: ACOSS.; 2020.
- 459 30. Furukawa TA, Kessler RC, Slade T, Andrews G. The performance of the K6 and K10 screening scales for  
460 psychological distress in the Australian National Survey of Mental Health and Well-Being. Psychological  
461 medicine. 2003;33(2):357.
- 462 31. Young Minds. Coronavirus: Impact on young people with mental health needs.  
463 [https://youngminds.org.uk/media/3708/coronavirus-report\\_march2020.pdf](https://youngminds.org.uk/media/3708/coronavirus-report_march2020.pdf). 2020.
- 464 32. Australian Government, Australian Institute of Health and Welfare. Secondary education: school  
465 retention and completion. [https://www.aihw.gov.au/reports/australias-welfare/secondary-education-school-  
466 retention-completion](https://www.aihw.gov.au/reports/australias-welfare/secondary-education-school-retention-completion) [Accessed 26 March 2021]. 2019.
- 467 33. Australian Government, Australian Institute of Health and Welfare. Profile of Indigenous Australians  
468 <https://www.aihw.gov.au/reports/australias-welfare/profile-of-indigenous-australians> [Accessed 26 March 2021].  
469 2019.
- 470 34. Duggan AK, McFarlane EC, Windham AM, Rohde CA, Salkever DS, Fuddy L, et al. Evaluation of  
471 Hawaii's Healthy Start Program. The Future of Children. 1999;9(1):66-90.
- 472 35. Sollis K. Measuring child deprivation and opportunity in Australia: applying the Nest Framework to  
473 develop a measure of deprivation and opportunity for children using the Longitudinal Study of Australian  
474 Children. Canberra; 2019 February.
- 475 36. Sciberras E, Patel P, Stokes MA, Coghill D, Middeldorp CM, Bellgrove MA, et al. Physical Health,  
476 Media Use, and Mental Health in Children and Adolescents With ADHD During the COVID-19 Pandemic in  
477 Australia. Journal of Attention Disorders. 2020;Online ahead of print (17 Dec).
- 478 37. The Royal Children's Hospital National Child Health Poll. COVID-19 pandemic: Effects on the lives of  
479 Australian children and families. Parkville, Victoria.; 2020.
- 480 38. Dickerson J, Kelly B, Lockyer B, Bridges S, Cartwright C, Willan K, et al. Experiences of lockdown  
481 during the Covid-19 pandemic: descriptive findings from a survey of families in the Born in Bradford study.  
482 Wellcome Open Res. 2021;5:228.

- 483 39. Nearchou F, Hennessy E, Flinn C, Niland R, Subramaniam SS. Exploring the Impact of COVID-19 on  
484 Mental Health Outcomes in Children and Adolescents: A Systematic Review. *Int J Environ Res Public Health*.  
485 2020;17(22):8479.
- 486 40. Dickerson J, Kelly B, Lockyer B, Bridges S, Cartwright C, Willan K, et al. Experiences of lockdown  
487 during the Covid-19 pandemic: descriptive findings from a survey of families in the Born in Bradford study  
488 [version 2; peer review: 2 approved]. *Wellcome Open Research*. 2021;5(228).
- 489 41. Patrick SW, Henkhaus LE, Zickafoose JS, Lovell K, Halvorson A, Loch S, et al. Well-being of Parents  
490 and Children During the COVID-19 Pandemic: A National Survey. *Pediatrics*. 2020;146(4):e2020016824.
- 491 42. Evans S, Mikocka-Walus A, Klas A, Olive L, Sciberras E, Karantzas G, et al. From “It Has Stopped Our  
492 Lives” to “Spending More Time Together Has Strengthened Bonds”: The Varied Experiences of Australian  
493 Families During COVID-19. *Front Psychol*. 2020;11:588667.
- 494 43. Nicolson S, Newell S, Collyer B. Australian Human Rights Commission. Impacts of COVID-19 on  
495 children and young people who contact Kids Helpline • September 2020.; 2020.
- 496 44. De Young A, Paterson R, March S, Hoehn E, Alisic., Cobham V, et al. COVID-19 Unmasked Young  
497 Children Report 2: Impact of the second wave in Australia on the mental health of young children and parents.  
498 Brisbane. Queensland Centre for Perinatal and Infant Mental Health, Children’s Health Queensland Hospital and  
499 Health Service. 2021.
- 500 45. Sinha I, Bennett D, Taylor-Robinson DC. Children are being sidelined by COVID-19. *BMJ*.  
501 2020;369:m2061.
- 502 46. Jones B, Woolfenden S, Pengilly S, Breen C, Cohn R, Biviano L, et al. COVID-19 pandemic: The impact  
503 on vulnerable children and young people in Australia. *Journal of Paediatrics and Child Health*. 2020;56(12):1851-  
504 5.
- 505 47. UN Research Roadmap for the COVID-19 Recovery. Leveraging the Power of Science for a More  
506 Equitable, Resilient and Sustainable Future, November 2020. United Nations; 2020.
- 507

## Supporting information

**S1 Fig. Timeline of Australia’s COVID-19 public health restrictions and policy changes from March to November 2020**

**S2 Fig. Respondent flowchart for analytic sample**

**S1 Table. Detailed financial experiences (weighted) of New South Wales and Victorian families surveyed after initial lockdown (June 2020) and during Victoria’s ongoing lockdown (September 2020) in proportions (95% confidence intervals).**



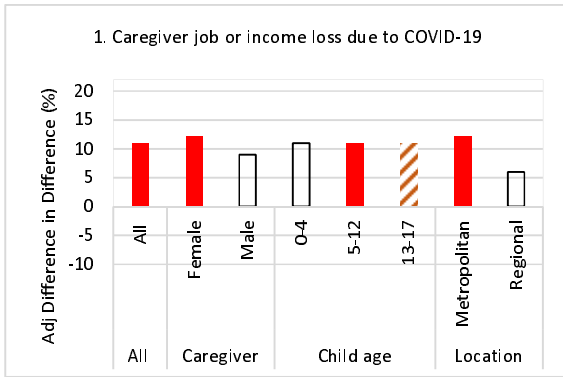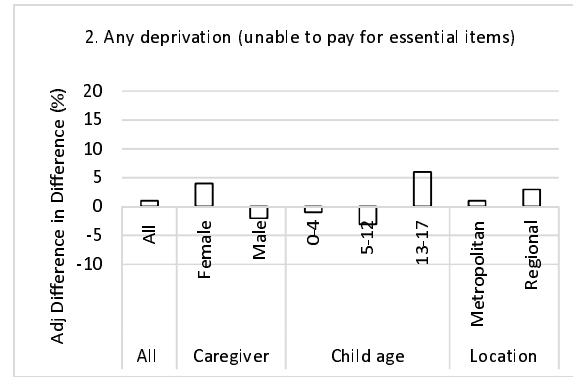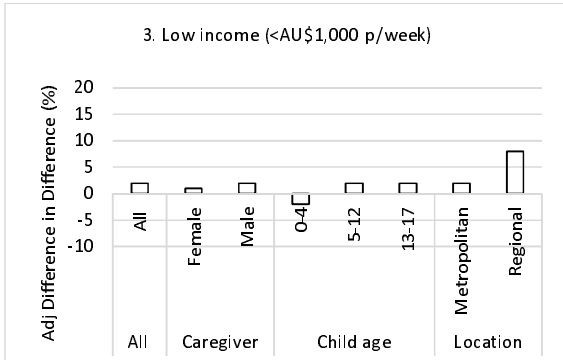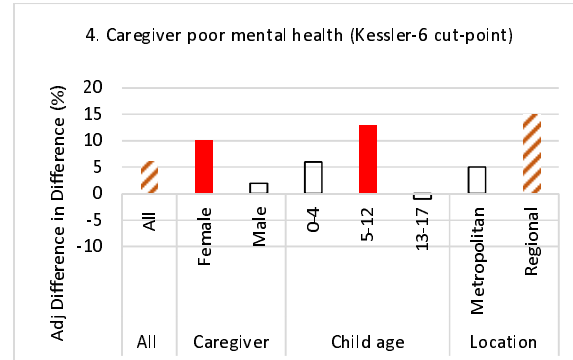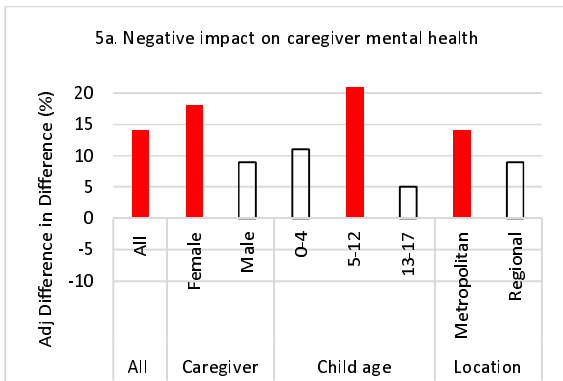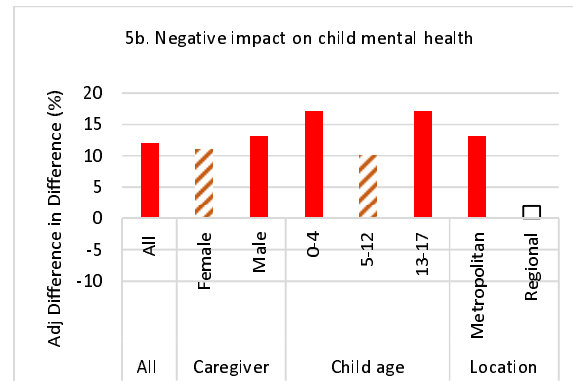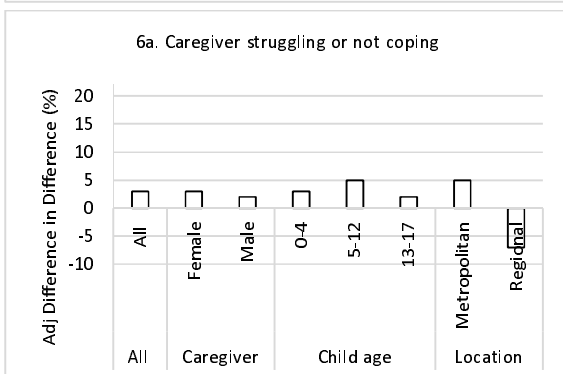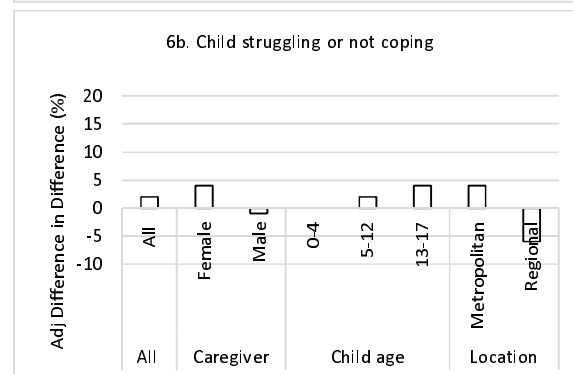

Legend: solid red, p<0.05; striped orange: p<0.1, white p≥0.1
